# Supplementary material for: Management of COVID-19-related Arterial Thrombosis Leading to Acute Limb-threatening Ischemia
Source: bioRxiv or medRxiv preprint supplement (doi:10.1101/2021.03.20.21252888), 2021-03-24
Supplement: Supplementary file [file media-1.pdf]

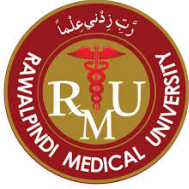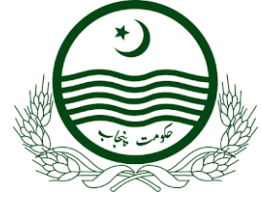

**Institutional review board and Ethics committee-IRB/EC**  
Rawalpindi Medical University  
District Headquarter Hospital Rawalpindi

July 02, 2020

Dr Mohammad Waqas Raza  
DHQ hospital Rawalpindi

Ref: IRB02-8765

Dear doctor

Please note that with reference to your study "Management of COVID-19-related Arterial Thrombosis Leading to Acute Limb-threatening Ischemia" has been reviewed by the IRB/EC. The IRB & Ethic committee is pleased to approve the study.

The IRB/EC is in accordance with the ICH and GCP guidelines. Any changes in the protocol should be notified to the committee for prior approval. All the informed consents should be retained for future reference. An updated report should be submitted to the IRB & Ethics Committee.

Sincerely,

A handwritten signature in blue ink, appearing to read "Iqbal Khan", with a stylized flourish at the end.

**Prof Iqbal Khan**  
Chairman, IRB/EC
